# Supplementary material for: Nicotine Addiction and Intensity of e-Cigarette Use by Adolescents in the US, 2014 to 2021
Source: PubMed Central journal article supplement (PMC9641541; doi:10.1001/jamanetworkopen.2022.40671), 2022-11-07
Supplement: jamanetwopen-e2240671-s001.pdf [file jamanetwopen-e2240671-s001.pdf]

## Supplementary Online Content

Glantz S, Jeffers A, Winickoff JP. Nicotine addiction and intensity of e-cigarette use by adolescents in the US, 2014 to 2021. *JAMA Netw Open*. 2022;5(11):e2240671. doi:10.1001/jamanetworkopen.2022.40671

**eFigure 1.** Number of Adolescents Using Different Tobacco Products

**eFigure 2.** Current e-Cigarette and Cigarette Use, Separating Out Dual Use (Reporting Current Use of Both e-Cigarettes and Cigarettes in the Same Survey)

**eFigure 3.** Days per Month Adolescents Used Cigarette, Cigars, and Smokeless Tobacco

**eTable 1.** NYTS Variables Used in the Analysis

**eTable 2.** Age of Tobacco Product Initiation Among Ever Users

**eTable 3.** Metaregressions for Changes in Tobacco Product Use Intensity Over Time, 2014-2021

**eTable 4.** Use Within 5 Minutes of Waking Among Sole Product Users

**eMethods.** YRBSS Supplemental Analysis

**eAppendix.** YRBSS Supplemental Analysis

**eTable 5.** Current Tobacco Product Use in YRBSS and NYTS (High School Students)

**eFigure 4.** e-Cigarette and Cigarette Use in YRBSS

**eFigure 5.** Percentage of e-Cigarette and Cigarette Users Who Used Product  $\geq 20$  d/mo

This supplementary material has been provided by the authors to give readers additional information about their work.

**eFigure 1.** Number of Adolescents Using Different Tobacco Products

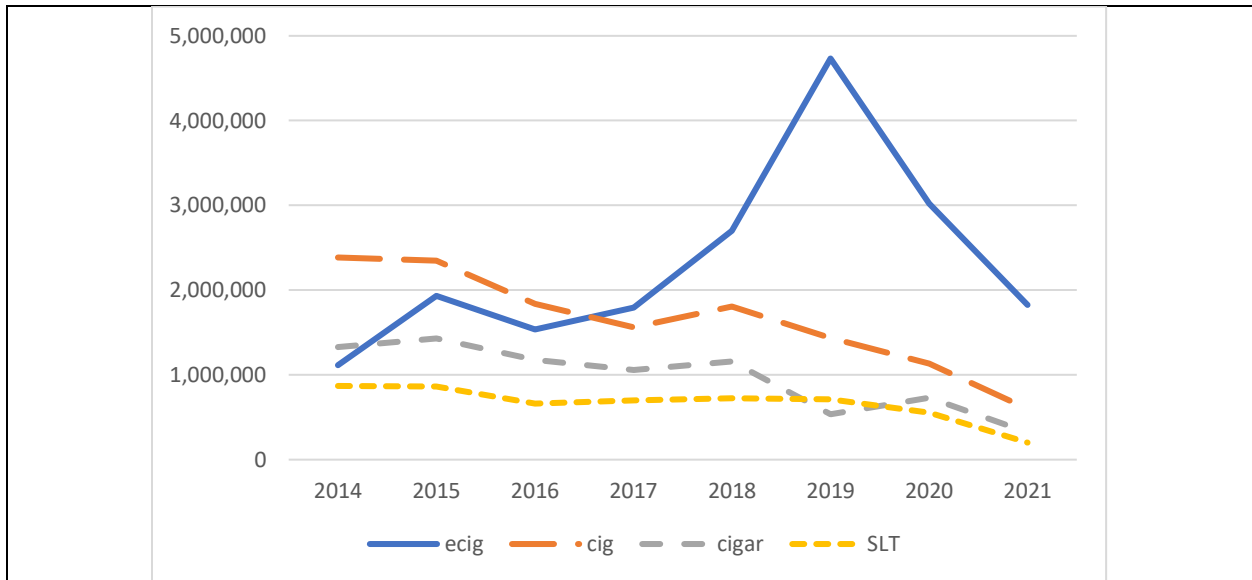

E-cigarettes became the most used first tobacco product in 2017, being used by more than all other first products combined beginning in 2019. Many students started with more than one product in the same year. As discussed in the main text, data from 2021 may underestimate tobacco use levels because of changes in the way the survey was administered, so the drop between 2020 and 2021 may be less than appears in this figure.

**eFigure 2.** Current e-Cigarette and Cigarette Use, Separating Out Dual Use (Reporting Current Use of Both e-Cigarettes and Cigarettes in the Same Survey)

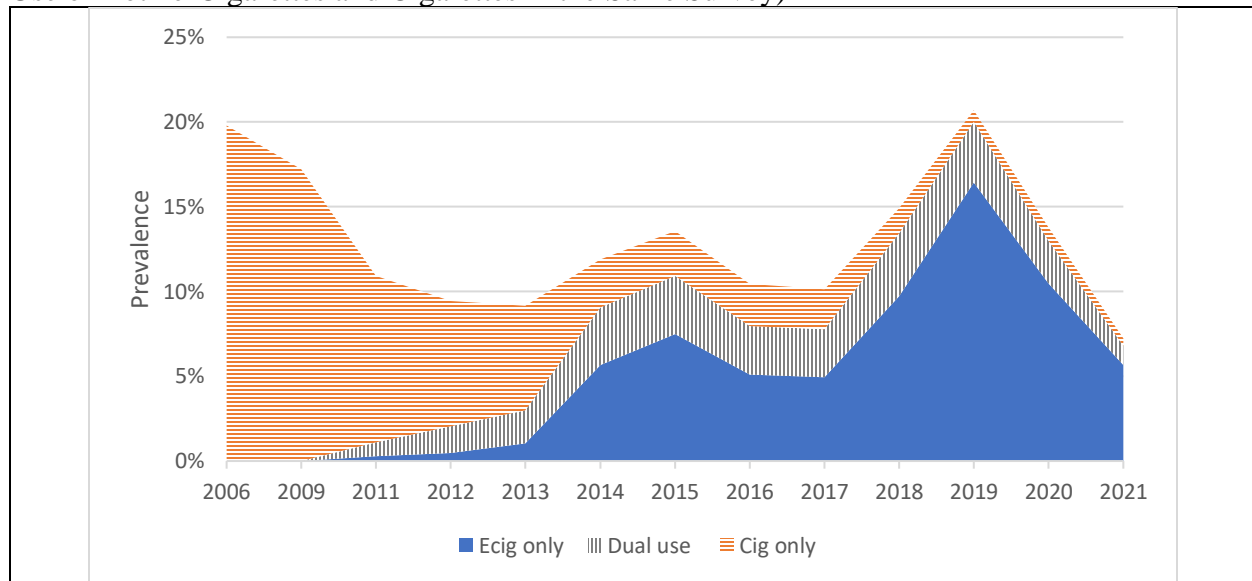

E-cigarette use started to substantially increase in 2014, when more youth were using e-cigarettes than cigarettes, with most cigarette smokers dual using with e-cigarettes. There was a dip in e-cigarette use from 2015 to 2017, possibly reflecting public health campaigns targeting e-cigarettes before the more addictive Juul product started to dominate the market. The historic decline in total cigarette plus e-cigarette use reversed after 2013 and peaked in 2019 at a higher level than cigarette smoking in 2006. Even with the drop in e-cigarette and cigarette use after 2019, prevalence of total use was at about the level last observed in 2013. E-cigarette use was not reported in NYTS in 2006 and 2009,<sup>18</sup> but use was not yet widespread; these years are included to provide long-term picture of changing use. Results for 2006 and 2009 are from CDC; years 2011 on were calculated by the authors. We did not include cigar and smokeless tobacco in this figure because doing so would generate many categories of dual and polyuse. As discussed in main text, the 2021 data may underestimate tobacco use levels because of changes in the way the survey was administered, so the drop between 2020 and 2021 may be less than appears in this figure.

**eFigure 3.** Days per Month Adolescents Used Cigarette, Cigars, and Smokeless Tobacco

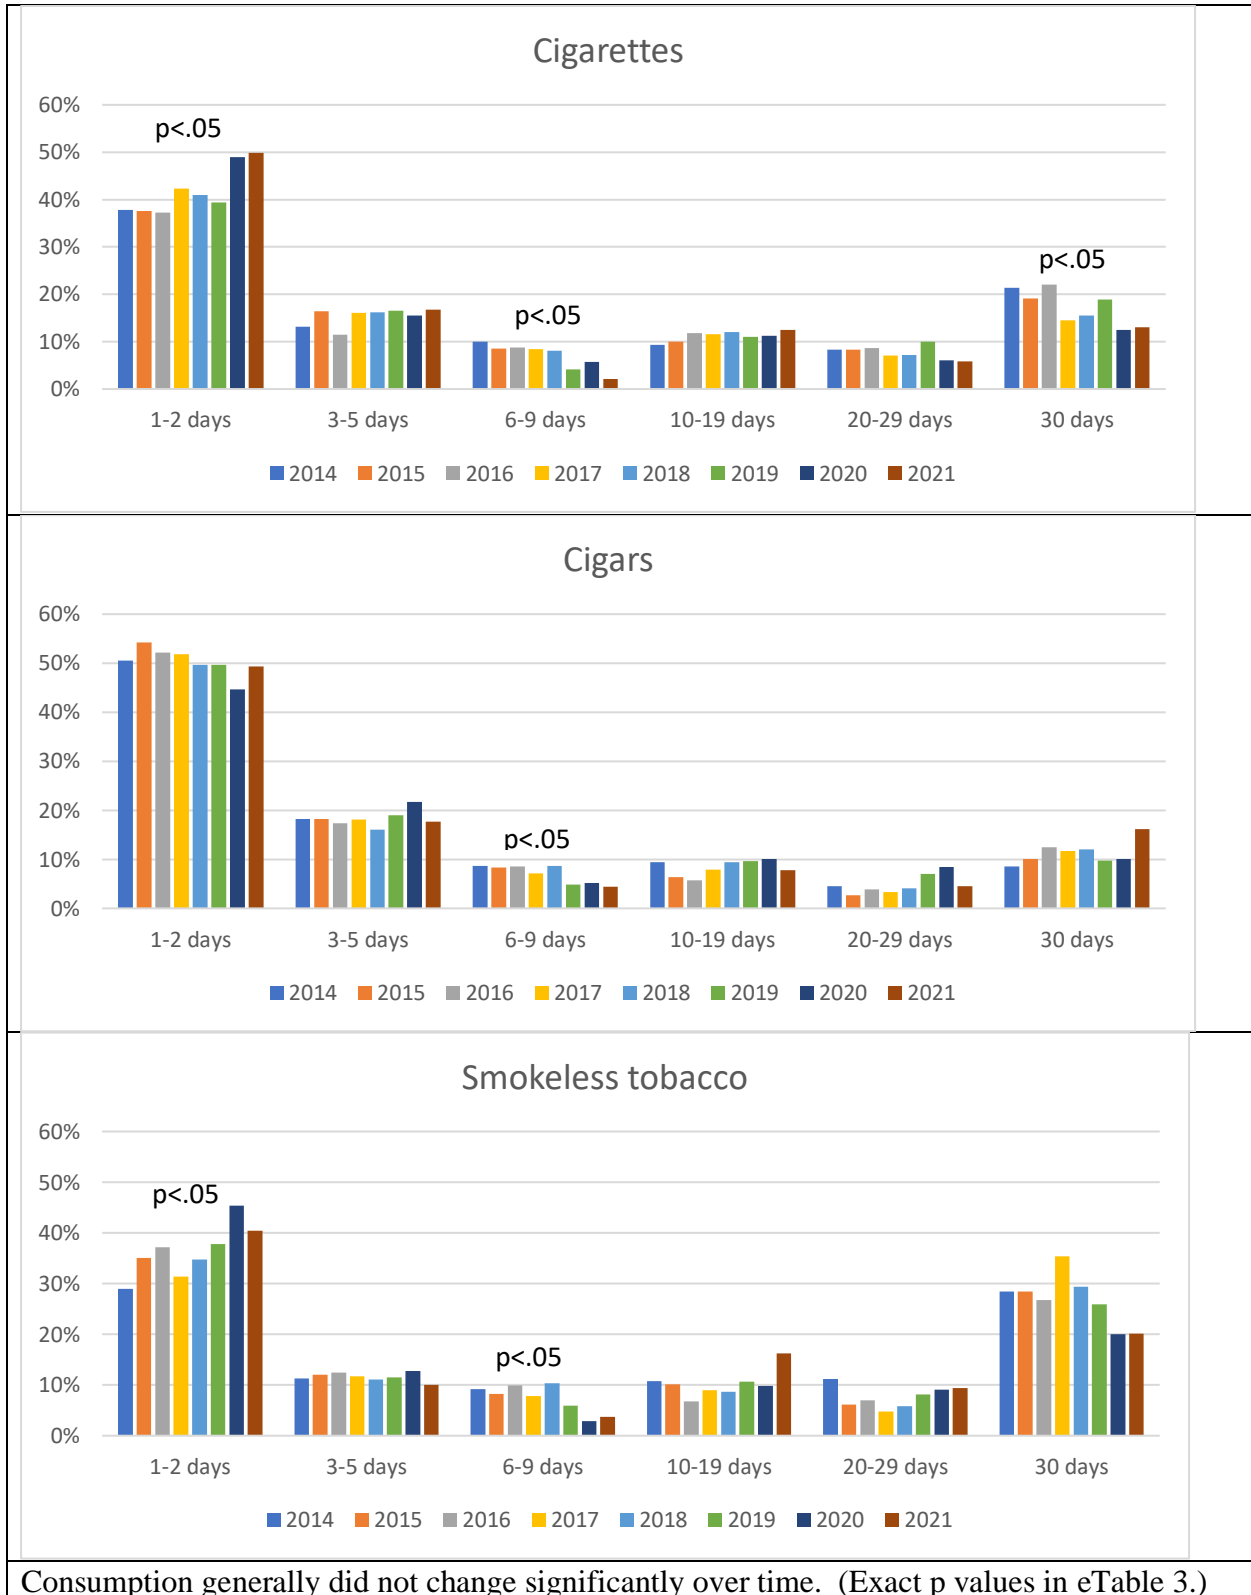

| eTable 1. NYTS Variables Used in the Analysis                                                                                                                                                                                                                                  |            |            |          |          |          |          |          |                |
|--------------------------------------------------------------------------------------------------------------------------------------------------------------------------------------------------------------------------------------------------------------------------------|------------|------------|----------|----------|----------|----------|----------|----------------|
| Question (on 2021 NYTS)                                                                                                                                                                                                                                                        | Year       |            |          |          |          |          |          |                |
|                                                                                                                                                                                                                                                                                | 2014       | 2015       | 2016     | 2017     | 2018     | 2019     | 2020     | 2021           |
| How old are you?                                                                                                                                                                                                                                                               | qn1        | qn1        | Q1       | Q1       | Q1       | Q1       | Q1       | QN1            |
| What is your sex?                                                                                                                                                                                                                                                              | qn2        | qn2        | Q2       | Q2       | Q2       | Q2       | Q2       | QN2            |
| Recoded from:<br>Are you Hispanic, Latino, Latina, or of Spanish origin?<br>What race or races do you consider yourself to be?<br>(Select one or more)                                                                                                                         | qn4<br>qn5 | qn4<br>qn5 | Q4<br>Q5 | Q4<br>Q5 | Q4<br>Q5 | Q4<br>Q5 | Q4<br>Q5 | QN4A<br>QN5A-E |
| Have you ever smoked a cigarette, even one or two puffs?                                                                                                                                                                                                                       | qn7        | qn6        | Q7       | Q7       | Q7       | Q6       | Q22      | QN35           |
| How old were you when you first smoked a cigarette, even one or two puffs?                                                                                                                                                                                                     | qn11       | qn10       | Q11      | Q8       | Q8       | Q7       | Q23      | QN36           |
| During the past 30 days, on how many days did you smoke cigarettes?                                                                                                                                                                                                            | qn13       | qn12       | Q13      | Q11      | Q11      | Q9       | Q25      | QN38           |
| Have you ever used an e-cigarette, even once or twice?                                                                                                                                                                                                                         | qn31       | qn28       | Q26      | Q28      | Q28      | Q34      | Q6       | QN6            |
| How old were you when you first used an e-cigarette, even once or twice?                                                                                                                                                                                                       | qn34       | qn31       | Q30      | Q29      | Q29      | Q35      | Q7       | QN7            |
| During the past 30 days, on how many days did you use e-cigarettes?                                                                                                                                                                                                            | qn35       | qn32       | Q31      | Q31      | Q31      | Q37      | Q9       | QN9            |
| Have you ever smoked a cigar, cigarillo, or little cigar, even one or two puffs?                                                                                                                                                                                               | qn20       | qn18       | Q18      | Q19      | Q19      | Q18      | Q35      | QN51           |
| How old were you when you first smoked a cigar, cigarillo, or little cigar, even one or two puffs?                                                                                                                                                                             | qn23       | qn21       | Q19      | Q20      | Q20      | Q19      | Q36      | QN52           |
| During the past 30 days, on how many days did you smoke cigars, cigarillos, or little cigars?                                                                                                                                                                                  | qn24       | qn22       | Q20      | Q21      | Q21      | Q20      | Q37      | QN53           |
| Have you ever used chewing tobacco, snuff, or dip, even just a small amount?                                                                                                                                                                                                   | qn27       | qn24       | Q22      | Q24      | Q24      | Q27      | Q44      | QN62           |
| How old were you when you first used chewing tobacco, snuff, or dip, even just a small amount?                                                                                                                                                                                 | qn28       | qn25       | Q23      | Q25      | Q25      | Q28      | Q45      | QN63           |
| During the past 30 days, on how many days did you use chewing tobacco, snuff, or dip?                                                                                                                                                                                          | qn29       | qn26       | Q24      | Q26      | Q26      | Q29      | Q46      | QN64           |
| How soon after you wake up do you want to use a tobacco product of any kind?                                                                                                                                                                                                   | qn46       | qn48       | Q56      | Q52      | Q52      | Q64      | Q62      | QN91           |
| First product used (among youth who used both cigarettes and e-cigarettes at least once)<br>Recode: E-cigarette first: ecig_first=1 if start_diff>0;<br>Started both products in the same year: ecig_first=0 if start_diff==0; Cigarettes first: ecig_first=-1 if start_diff<0 |            |            |          |          |          |          |          |                |

| <b>eTable 2.</b> Age of Tobacco Product Initiation Among Ever Users                                                                                 |                                    |                                  |                     |                |        |
|-----------------------------------------------------------------------------------------------------------------------------------------------------|------------------------------------|----------------------------------|---------------------|----------------|--------|
| Age (95% CI)                                                                                                                                        | Year of survey*                    | Age at time of survey† (years)   | Constant            | R <sup>2</sup> | No.    |
| e-cigarette                                                                                                                                         | -0.159<br>(-0.176-0.143)<br>p<.001 | 0.824<br>(0.810-0.838)<br>p<.001 | 13.7<br>(13.6-13.7) | 0.51           | 35,507 |
| cigarette                                                                                                                                           | 0.017<br>(-0.011-0.045)<br>p=.235  | 0.668<br>(0.642-0.695)<br>p<.001 | 12.1<br>(12.0-12.2) | 0.21           | 25,171 |
| cigars                                                                                                                                              | 0.015<br>(-0.011-0.041)<br>p=.253  | 0.775<br>(0.749-0.800)<br>p<.001 | 12.8<br>(12.7-12.8) | 0.31           | 18,618 |
| smokeless tobacco                                                                                                                                   | -0.036<br>(-0.074-0.002)<br>p=.064 | 0.686<br>(0.650-0.722)<br>p<.001 | 12.6<br>(12.4-12.7) | 0.24           | 9,584  |
| *Survey year, centered on 2014, the year of the first survey in the analytical sample<br>†Age centered on 14.4868, the mean age of all respondents. |                                    |                                  |                     |                |        |

**eTable 3. Metaregressions for Changes in Tobacco Product Use Intensity Over Time, 2014-2021**

| Days/month | E-cigarettes  |               |               |                  | Cigarettes    |               |               |              | Cigars (including cigarillos and little cigars) |               |               |              | Smokeless tobacco products (chewing tobacco, snuff, or dip) |               |               |              |
|------------|---------------|---------------|---------------|------------------|---------------|---------------|---------------|--------------|-------------------------------------------------|---------------|---------------|--------------|-------------------------------------------------------------|---------------|---------------|--------------|
|            | slope         | 95%CI         |               | p                | Slope         | 95%CI         |               | p            | slope                                           | 95%CI         |               | p            | slope                                                       | 95%CI         |               | p            |
| 1-2 days   | <b>-0.030</b> | <b>-0.036</b> | <b>-0.023</b> | <b>&lt;0.001</b> | <b>0.016</b>  | <b>0.005</b>  | <b>0.027</b>  | <b>0.013</b> | -0.006                                          | -0.016        | 0.004         | 0.173        | <b>0.017</b>                                                | <b>0.004</b>  | <b>0.031</b>  | <b>0.020</b> |
| 3-5 days   | -0.003        | -0.010        | 0.005         | 0.395            | 0.005         | -0.004        | 0.013         | 0.227        | 0.001                                           | -0.006        | 0.008         | 0.700        | -0.001                                                      | -0.007        | 0.006         | 0.808        |
| 6-9 days   | <b>-0.013</b> | <b>-0.019</b> | <b>-0.007</b> | <b>0.002</b>     | <b>-0.011</b> | <b>-0.016</b> | <b>-0.006</b> | <b>0.002</b> | <b>-0.007</b>                                   | <b>-0.012</b> | <b>-0.002</b> | <b>0.015</b> | <b>-0.009</b>                                               | <b>-0.016</b> | <b>-0.003</b> | <b>0.012</b> |
| 10-19 days | 0.007         | 0.002         | 0.012         | 0.010            | 0.004         | -0.001        | 0.009         | 0.117        | 0.003                                           | -0.003        | 0.010         | 0.286        | 0.003                                                       | -0.006        | 0.012         | 0.493        |
| 20-29 days | <b>0.017</b>  | <b>0.009</b>  | <b>0.024</b>  | <b>0.002</b>     | -0.003        | -0.008        | 0.002         | 0.254        | 0.004                                           | -0.002        | 0.010         | 0.142        | 0.000                                                       | -0.009        | 0.010         | 0.980        |
| 30 days    | <b>0.021</b>  | <b>0.017</b>  | <b>0.026</b>  | <b>&lt;0.001</b> | <b>-0.013</b> | <b>-0.022</b> | <b>-0.003</b> | <b>0.017</b> | 0.005                                           | -0.002        | 0.011         | 0.149        | -0.012                                                      | -0.026        | 0.002         | 0.082        |

**Bold italic** = significantly falling over time. **Bold** = significantly increasing over time.

**eTable 4. Use Within 5 Minutes of Waking Among Sole Product Users**

| Mean (SE)              | E-cigarette         |        | Cigarette           |        | Cigar               |        | Smokeless tobacco   |        |
|------------------------|---------------------|--------|---------------------|--------|---------------------|--------|---------------------|--------|
| 2014                   | 0.4%                | (0.2%) | 7.2%                | (1.8%) | 0.4%                | (0.3%) | 5.6%                | (2.1%) |
| 2015                   | 0.5%                | (0.2%) | 4.3%                | (1.4%) | 0.0%                | -      | 7.2%                | (3.1%) |
| 2016                   | 0.8%                | (0.4%) | 6.1%                | (2.1%) | 1.3%                | (0.7%) | 4.3%                | (2.8%) |
| 2017                   | 0.5%                | (0.4%) | 5.0%                | (1.9%) | 0.2%                | (0.2%) | 0.5%                | (0.5%) |
| 2018                   | 3.5%                | (0.7%) | 8.6%                | (2.9%) | 1.0%                | (0.6%) | 6.6%                | (2.3%) |
| 2019                   | 4.3%                | (0.6%) | 9.1%                | (3.9%) | 0.4%                | (0.4%) | 8.0%                | (3.8%) |
| 2020                   | 9.8%                | (1.3%) | 1.4%                | (1.0%) | 6.3%                | (2.4%) | 0.5%                | (0.5%) |
| 2021                   | 10.3%               | (1.6%) | 6.3%                | (5.3%) | 2.3%                | (1.6%) | 6.5%                | (3.5%) |
| Trend* (OR/yr) (95%CI) | 1.687 (1.534-1.854) |        | 0.992 (0.849-1.159) |        | 1.486 (1.160-1.903) |        | 0.969 (0.809-1.160) |        |
| p                      | <0.001              |        | 0.920               |        | 0.002               |        | 0.730               |        |
| n†                     | 9,124               |        | 1,332               |        | 1,788               |        | 869                 |        |

\* Logistic regression against survey year (centered on 2014)  
† Subpopulation size. Full sample sizes: 152,528, 152,388, 152,386, 152,403

## eMethods. YRBSS Supplemental Analysis

We used the Centers for Disease Control and Prevention Youth Behavioral Risk Surveillance System<sup>15</sup> (YRBSS), a biannual nationally representative in-school survey of high school students from 2015, 2017, and 2019, all years in which the YRBS provided information on the number of days per month that respondents used e-cigarettes, cigarettes, cigars, and SLT.

Following the main NYTS analysis, “ever use” of a product was coded as “yes” if the respondent reported ever using the product, even 1 or 2 times. “Current use” was coded as “yes” if the respondent reported using the product 1 or more of the past 30 days. There was no required threshold of lifetime use (such as 100 cigarettes in their lifetime) for current use. “Dual use” contains respondents who report current use of both e-cigarettes and cigarettes in the same survey year.

## eAppendix. YRBSS Supplemental Analysis

The YRBSS and NYTS results for high school students showed similar changes among the three years available for YRBSS, with the YRBSS generally yielding higher estimates of e-cigarette and cigarette (eTable 5).

| Year | E-cigarette only |       | Dual use |      | Cigarette only |      | Total e-cigarette |       | Total cigarette |      |
|------|------------------|-------|----------|------|----------------|------|-------------------|-------|-----------------|------|
|      | YRBSS            | NYTS  | YRBS     | NYTS | YRBS           | NYTS | YRBS              | NYTS  | YRBS            | NYTS |
| 2015 | 15.5%            | 10.6% | 7.2%     | 5.0% | 3.1%           | 4.0% | 22.7%             | 15.6% | 10.3%           | 9.0% |
| 2017 | 6.3%             | 7.3%  | 5.6%     | 4.0% | 2.4%           | 3.6% | 11.9%             | 11.3% | 8.0%            | 7.6% |
| 2019 | 26.6%            | 22.5% | 4.8%     | 5.0% | 0.6%           | 0.8% | 31.4%             | 27.5% | 5.4%            | 5.8% |

Consistent with the NYTS results, the YRBSS showed a shift to more days of use among e-cigarette users, with little or no change over the same period of time for cigarettes, cigars and SLT (compare eFigure 4 with Figure 3 and eFigure 3). When limiting the NYTS data to high school students the same general pattern was present for e-cigarette and cigarettes as in the NYTS. Between 2015 and 2019, the percentage of e-cigarette users that used 20+ days per month shifted from 12% to 33%, while the percentage of cigarette users that used 20+ days per month shifted from 31% to 22% in YRBSS (eFigure 5).



**eFigure 4.** e-Cigarette and Cigarette Use in YRBSS

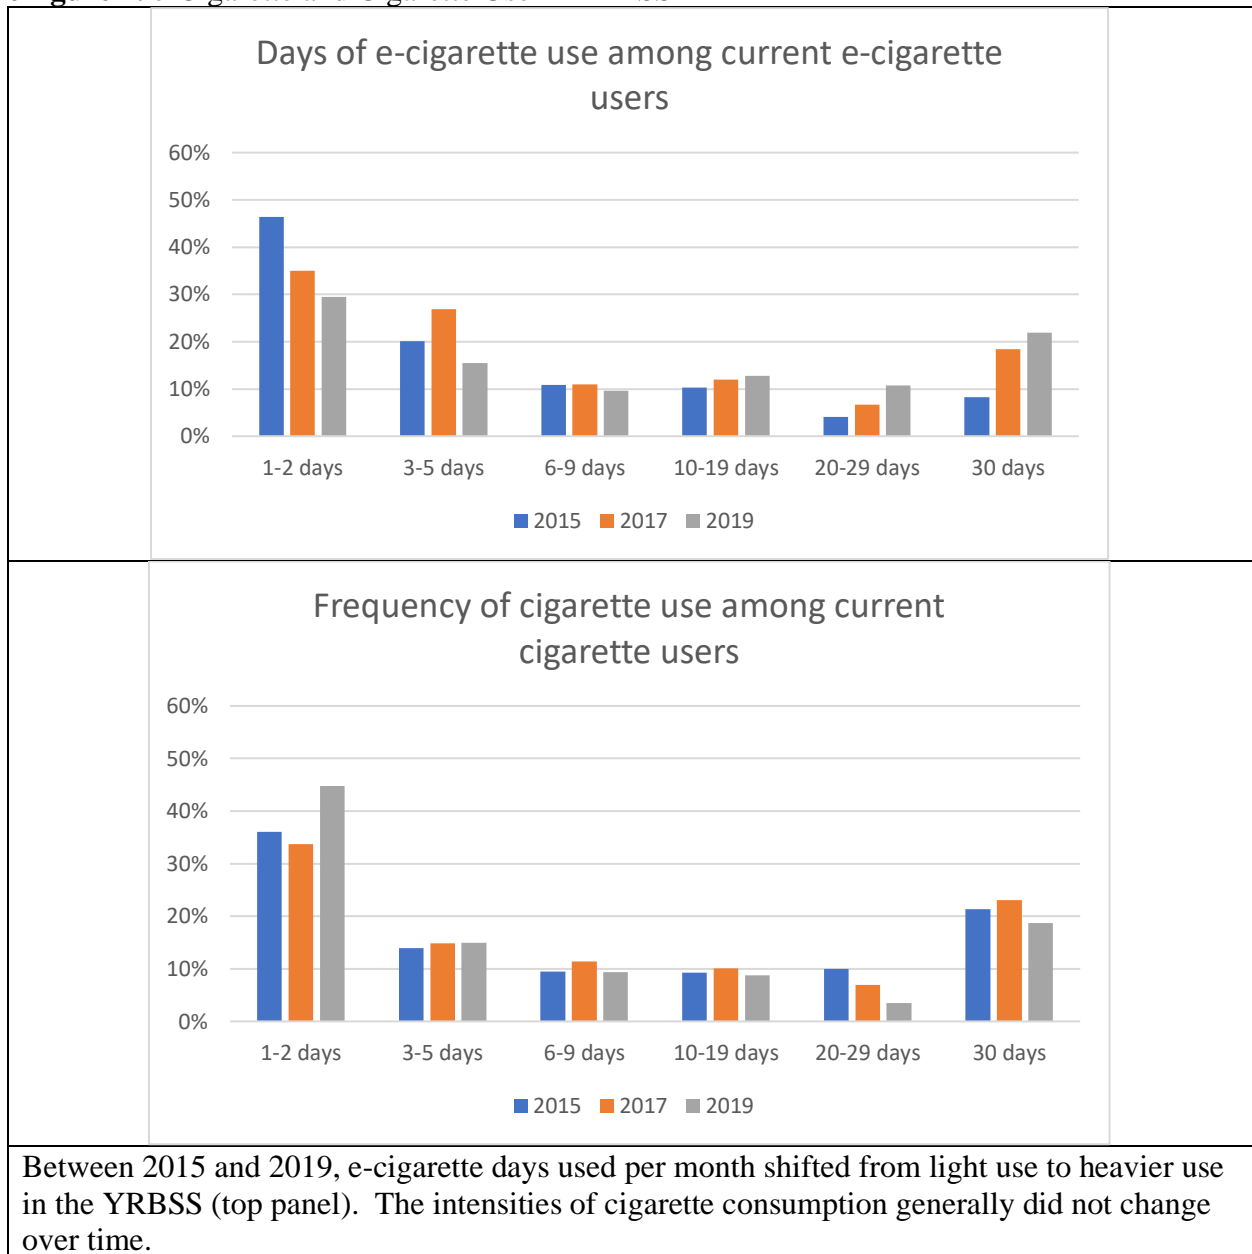

**eFigure 5.** Percentage of e-Cigarette and Cigarette Users Who Used Product  $\geq 20$  d/mo

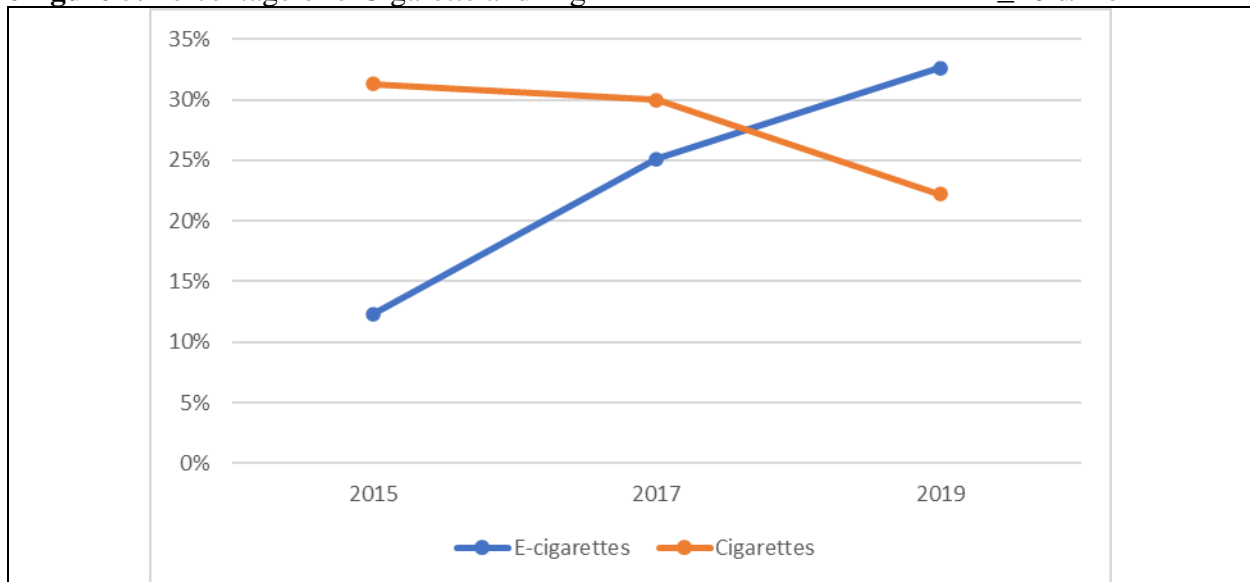

Between 2015 and 2019, the percentage of e-cigarette users that used 20+ days per month shifted from 12% to 33%, while the percentage of cigarette users that used 20+ days per month shifted from 31% to 22% in YRBSS.
